# Supplementary material for: Independent ischemic stroke risk factors in older Americans: a systematic review
Source: Aging (Albany NY). 2019 May 24;11(10):3392–407. doi: 10.18632/aging.101987 (PMC6555455; doi:10.18632/aging.101987)
Supplement: Appendix A. Newcastle-Ottawa Quality Assessment Scale [file aging-11-101987-s001.pdf]

**Appendix A. Newcastle-Ottawa Quality Assessment Scale.**

|                                                     | Selection                         |                                |                           |                     | Comparability            |                       | Outcome     |             |
|-----------------------------------------------------|-----------------------------------|--------------------------------|---------------------------|---------------------|--------------------------|-----------------------|-------------|-------------|
|                                                     | Representatives of Exposed Cohort | Selection of Nonexposed Cohort | Ascertainment of Exposure | Outcome Not Present | Comparability of Cohorts | Assessment of Outcome | Follow-up A | Follow-up B |
| <b>Serologic/Diagnostic</b>                         | A                                 | N/A                            | A                         | B                   | A                        | B                     | A           | B           |
| Kizer et al. (2014)                                 |                                   |                                |                           |                     |                          |                       |             |             |
| Cao et al., (2003)                                  |                                   |                                |                           |                     |                          |                       |             |             |
| Sacco et al., (2004)                                |                                   |                                |                           |                     |                          |                       |             |             |
| Abbott et al., (2007)                               |                                   |                                |                           |                     |                          |                       |             |             |
| Shores et al. (2014)                                |                                   |                                |                           |                     |                          |                       |             |             |
| Khawaja et al., (2014)                              |                                   |                                |                           |                     |                          |                       |             |             |
| Raipathak et al., (2011)                            |                                   |                                |                           |                     |                          |                       |             |             |
| Saber et al., (2015)                                |                                   |                                |                           |                     |                          |                       |             |             |
| Gardin et al., (2001)                               |                                   |                                |                           |                     |                          |                       |             |             |
| <b>Traditional</b>                                  | A                                 | N/A                            | B                         | B                   | A                        | B                     | A           | B           |
| Mukamel et al. (2005)                               |                                   |                                |                           |                     |                          |                       |             |             |
| Sacco et al. (1999a)                                |                                   |                                |                           |                     |                          |                       |             |             |
| Ottenbacher et al. (2004)                           |                                   |                                |                           |                     |                          |                       |             |             |
| Naderi, Masoomi, Mozaffar and Malik (2014)          |                                   |                                |                           |                     |                          |                       |             |             |
| Lichtman, Krumboltz, Wang, Radford and Brass (2002) |                                   |                                |                           |                     |                          |                       |             |             |
| Abbott et al. (2001)                                |                                   |                                |                           |                     |                          |                       |             |             |
| Seshardi et al., (2001)                             | A                                 | N/A                            | A                         | B                   | A                        | B                     | A           | B           |
| Colantonio, Kasl & Ostfield (1992)                  | A                                 | N/A                            | B                         | B                   | A                        | B                     | A           | B           |

|                                              |   |     |   |     |   |   |     |     |
|----------------------------------------------|---|-----|---|-----|---|---|-----|-----|
| Sacco et al. (1998)                          | A | N/A | A | A   | A | B | N/A | N/A |
| Mukamel et al. (2005)                        | A | N/A | B | N/A | A | C | A   | B   |
| <i>Genetic</i>                               |   |     |   |     |   |   |     |     |
| Ferrucci et al. (1997)                       | B | N/A | A | N/A | A | B | A   | B   |
| Brophy et al. (2006)                         | B | N/A | A | N/A | A | A | A   | B   |
| Olsen et al. (2015)                          | A | N/A | A | N/A | A | A | A   | B   |
| <i>Psychosocial</i>                          |   |     |   |     |   |   |     |     |
| Arbelaez, Ariyo, Crum, Fried and Ford (2007) | A | N/A | B | B   | A | B | A   | B   |
| Henderson et al., (2013)                     | A | N/A | B | B   | A | B | A   | B   |
| Yu et al., (2015)                            | A | N/A | A | A   | A | A | A   | A   |
| <i>Cognitive/ Miscellaneous</i>              |   |     |   |     |   |   |     |     |
| Ostir et al., (2003)                         | B | N/A | B | A   | A | C | A   | B   |
| Elkins et al., (2004)                        | A | N/A | B | A   | A | C | A   | B   |
| Ferruci et al., (1999)                       | A | N/A | B | A   | A | C | A   | B   |
| Luchsinger et al., (2001)*                   | A | N/A | A | N/A | A | B | A   | B   |

**Selection:**

1) Representativeness of the exposed cohort—A = truly representative of the average number of patients in the community; B = somewhat representative of the average number of patients in the community; C = selected group of users, e.g., nurses, volunteers; D = no description of the derivation of the cohort.

2) Selection of the nonexposed cohort—A = drawn from the same community as the exposed cohort; B = drawn from a different source; C = no description of the derivation of the nonexposed cohort.

3) Ascertainment of exposure—A = secure record (e.g., surgical records); B = structured interview; C = written self-report; D = no description.

4) Demonstration that outcome of interest was not present at start of study—A = yes; B = no.

**Comparability:**

1) Comparability of cohorts on the basis of the design or analysis—A = study controls for known risk factors of ischemic stroke (e.g., Age; Gender); B = study controls for any additional factor (these criteria could be modified to indicate specific control for a second important factor).

**Outcome:**

1) Assessment of outcome—A = independent blind assessment; B = record linkage; C = self-report; D = no description.

2) Was follow-up long enough for outcomes to occur—A = yes (select an adequate follow-up period for outcome of interest); B = no.

3) Adequacy of follow-up of cohorts—A = complete follow up, all subjects accounted for; B = small number of subjects lost to follow-up unlikely to introduce bias; C = no description of subjects lost; D = no statement on loss to follow-up.
